1 **Outbreak analysis with a logistic growth model shows COVID-19 suppression dynamics**  
2 **in China**

3

4 Yi Zou<sup>1</sup>, Stephen Pan<sup>1</sup>, Peng Zhao<sup>1</sup>, Lei Han<sup>1</sup>, Xiaoxiang Wang<sup>2</sup>, Lia Hemerik<sup>3</sup>, Johannes  
5 Knops<sup>1</sup>, Wopke van der Werf<sup>4</sup>

6

7 <sup>1</sup> Department of Health and Environmental Sciences, Xi'an Jiaotong-Liverpool University,  
8 215123, Suzhou, China

9 <sup>2</sup> School of the Environmental Science and Engineering, Southern University of Science and  
10 Technology, 518055, Shenzhen, China

11 <sup>3</sup> Wageningen University, Biometris, P.O. Box 16, 6700 AA Wageningen, The Netherlands

12 <sup>4</sup> Wageningen University, Centre for Crop Systems Analysis, P.O. Box 430, 6700 AK  
13 Wageningen, The Netherlands

14

15 Corresponding author:

16 Wopke van der Werf ([wopke.vanderwerf@wur.nl](mailto:wopke.vanderwerf@wur.nl))

17

18 **Abstract**

19

20 China experienced an outbreak of a novel coronavirus, SARS-CoV2, from mid-January till  
21 mid-March 2020. Here we review the curves of epidemic growth and decline of the virus in  
22 China using a phenomenological logistic growth model to summarize the dynamics of the  
23 outbreak using three parameters that characterize the epidemic's timing, rate and peak. During  
24 the initial phase, the number of cases doubled every 2.7 (range 2.2 – 4.4) days. The rate of  
25 increase in the number of reported cases peaked approximately 10 days after suppression  
26 measures were started on 23-25 January 2020. The peak in the number of reported sick cases  
27 occurred on average 18 days after the start of measures. From the time of starting measures  
28 till the peak, the number of cases increased by a factor 38.5 in the province Hubei, and by a  
29 factor 9.5 for all of China (range: 6.2-20.4 in the other provinces). Complete suppression took  
30 up to 2 months (range: 23-57d.), during which period severe restrictions, social distancing  
31 measures, testing and isolation of cases were in place. The suppression of the disease in China  
32 has been successful, acting as a beacon of hope for countries outside China where the  
33 epidemic is still in a phase of increase and authorities need to decide their course of action.

34 The coronavirus SARS-CoV2 emerged in Wuhan, Hubei province, China, in late 2019. From  
35 there it spread, first in Hubei, then across China during the spring holiday, and finally across  
36 the world. Currently (as of 24 March 2020), the virus has been reported from 196 countries  
37 and the cumulative number of cases outside China is now about four times as large as the  
38 cumulative number of cases in China<sup>1</sup>. In mainland China, few new cases have been reported  
39 since 18 March, and most new cases have originated from outside China<sup>2</sup>. Thus, the SARS-  
40 CoV-2 outbreak in China appears to be, for now, under control.

41  
42 Virtually the entire global population is susceptible to SARS-CoV2 infection and no vaccine  
43 is available yet. Unless a successful NPI (Non-Pharmaceutical Intervention) strategy is  
44 implemented in the early stages of transmission, an exponential global proliferation threatens  
45 to overwhelm the health care systems of many countries. Three NPI strategies are being  
46 discussed for managing the current COVID-19 epidemic: (1) suppression, (2) mitigation, and  
47 (3) containment<sup>3</sup>. In **suppression**, strict measures are taken to reverse the epidemic spread,  
48 essentially by bringing the effective reproduction number  $R_e$  (the number of new cases per  
49 existing case) below one<sup>4,5</sup>. Social distancing is a key factor in suppression<sup>6</sup>. In **mitigation** the  
50 aim is not to necessarily stop all transmission, but rather to reduce the rate of transmission and  
51 in effect lower the number of infected people at any given time<sup>3,7</sup>. It has been suggested that  
52 mitigation strategies might prevent inundation of the health care system by “flattening” the  
53 peak of sick people<sup>3</sup>. However, even in the most optimistic scenarios for mitigation,  
54 healthcare capacity is likely to be still seriously overwhelmed, as it was in Wuhan in February  
55 2020 and as is now in Italy in March 2020. Herd immunity has been suggested as a  
56 component of mitigation, but is only a viable option once a vaccine is available because up to  
57 20% of people with confirmed infection develops serious symptoms and needs hospitalization  
58 or intensive care<sup>8</sup>. The proportion of unreported cases is uncertain (86% before measures but

59 later on 16-21% in the whole of China according to Li, et al. <sup>9</sup>; 59% or more in Wuhan  
60 according to Wang, et al. <sup>10</sup>). If underreporting is accounted for, the proportion of infected  
61 people requiring hospitalization is still in the order of 3% or more. **Containment** is based on  
62 intensive surveillance of possible cases, testing, followed by isolation of infected people and  
63 their contacts. Containment is only possible if the virus is not freely circulating in a  
64 population. Currently, because in many countries outside of China the virus is circulating  
65 within the population, these countries are practicing suppression. Policy makers may ask:

66

67 (1) How long it will take for the epidemic to peak after suppression measures have been  
68 implemented?

69 (2) What will the peak number of sickness cases be?

70 (3) How long do suppression measures need to be maintained to suppress the virus to  
71 sufficiently low incidence to allow containment (search and quarantine flare-ups of the  
72 virus)?

73

74 Here, we analyze with a phenomenological logistic model the epidemics of SARS-CoV2 in  
75 China and 20 of its provinces that reported more than 150 cases. The logistic model is widely  
76 used in ecology to analyze boom and bust population dynamics<sup>11</sup>. Logistic models are not as  
77 widely used in human disease epidemiology as more mechanistic SIR and SEIR models<sup>12-14</sup>  
78 because the parameters lack a strict mechanistic interpretation in terms of transmission rate  
79 and disease etiology (e.g. latency period, incubation period and infectious period). However,  
80 this disadvantage is compensated by the usefulness of the parameters for describing the  
81 outbreak dynamics in time. We do not imply that logistic models can replace established  
82 epidemiological models, but we do argue that phenomenological models, given the urgency  
83 and severe consequences of the worldwide SARS-CoV2 outbreak for public health

84 management, have a place along mechanistic models to inform on disease dynamics<sup>15</sup>. Using  
85 data from China, logistic models shows the key disease dynamic parameters before and after  
86 suppression policies were implemented<sup>16</sup>.

87  
88 The cumulative number of cases (confirmed by testing or based on clinical symptoms) was  
89 described very well by a logistic growth pattern with  $R^2$  greater than 0.99 for all provinces,  
90 except Shandong ( $R^2 > 0.98$ , Table A1). Three provinces enacted suppression measures on 23  
91 January, five implemented measures on 24 January, and the remaining 12 provinces started  
92 measures on 25 January. The time scale for the increase was  $c = 3.91$  d. for China  
93 (excluding Hubei, range 3.13 - 6.39) and 4.13 d. for Hubei (Table A1), indicating doubling  
94 times of  $c * \ln(2) = 2.7$  d. (range 2.2 - 4.4 d) and 2.9 d. for China (excluding Hubei) and for  
95 Hubei, respectively, during the early epidemic. Some lack of fit during the early phase of the  
96 epidemic (before measures) suggests the actual doubling times may be even shorter than these  
97 estimates (Table A1).

98  
99 The number of reported active sick cases (total infected minus recovered minus deceased) in  
100 Hubei peaked 25 days after suppression measures were implemented, which in the model also  
101 indicates the peak of number of deaths on the same day. Outside Hubei, the peak number of  
102 reported sick cases (and peak of daily number dying) was on average reached 18 days after  
103 the start of suppression (Table 1). The rate of daily increase in reported cases peaked 17 days  
104 after the start of suppression measures in Hubei, and on average 10 days after the start of  
105 measures in the other provinces (range: 8 to 15 days). When assuming a reporting delay of 6  
106 days<sup>9</sup>, the actual peak in the rate of increase occurred at 11 days in Hubei and at 4 days in the  
107 other provinces, and the actual peak in the number of sick cases peaked at 19 days in Hubei  
108 and at 12 days after the start of measures, in the other provinces.

109

110 The relative rate of increase in the number of cases at the time of the peak rate was rather  
111 consistent among provinces, with an average of 0.11 cases/case/day for Hubei and 0.12  
112 cases/case/day for the rest of China (range: 0.08 to 0.15). Between suppression  
113 implementation and the peak number of reported cases, the number of active cases in Hubei  
114 increased by a factor 38.5, while in other provinces it increased by a factor of 9.5 with  
115 considerable variation between provinces (range: 6.2 in Hainan and Chongqing to 20.4 in  
116 Heilongjiang). If a 6-day reporting delay is included in the estimate of the factor increase  
117 from the start of measures to the peak, then this multiplication factor is diminished to a value  
118 of 9.5 for Hubei and an average of 2.6 for the other provinces. The daily death rate of the  
119 active sick people was 0.34 percent per day for Hubei, much higher than in other provinces  
120 (on average 0.05 percent per day, ranging between 0 in Jiangsu Province (see also Sun, et al.  
121 <sup>17</sup>) and 0.18 percent per day in Hainan Province, Appendix 3), which indicates that on the day  
122 of peak sick in Hubei (50,000 cases), 150 individuals died. Cumulative to 10 March, the  
123 modelled logistic curve showed that for China (excluding Hubei) 0.85% of the reported cases  
124 died which is close to the actual value of 0.86%. The death rate was overestimated in Hubei as  
125 6.7%, compared to the actual 4.5%, due to the actual daily death rate declining during the  
126 later stages of the epidemic.

127

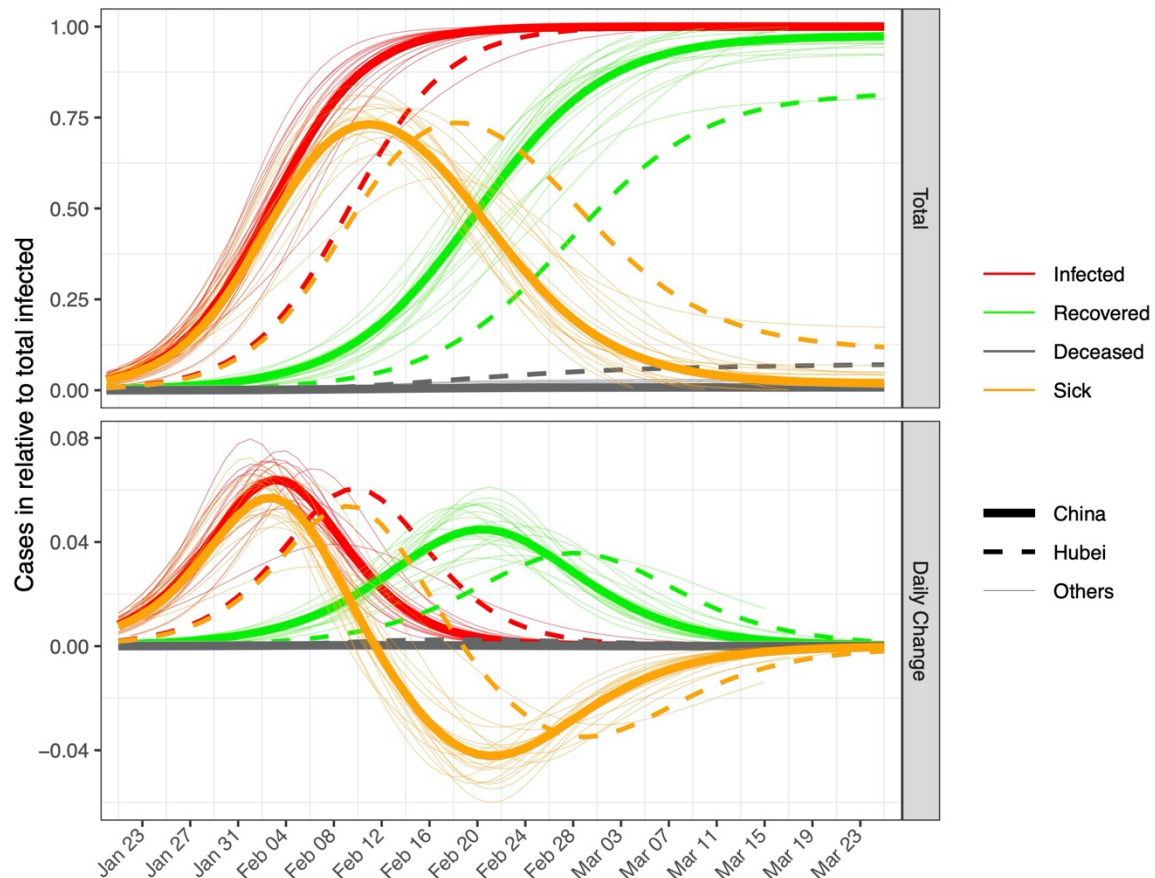

128  
129 Fig. 1. Fitted epidemic curves based on the observed data of SARS-CoV2 in China excluding  
130 Hubei (thick solid lines), Hubei (dashed lines), and 19 other provinces (thin solid lines). The  
131 y-axis of the top panel shows the number of cases relative to the maximum cumulative  
132 infected for each region (the value  $a$ , see method). The bottom panel shows the daily change  
133 on the same relative scale. Red, green and grey colors indicate confirmed, recovered and  
134 deceased cases. Orange color indicates the number of “active” sick cases (relative to total  
135 infected, top panel), i.e. infected and not yet recovered or deceased, and the daily changes  
136 (bottom panel), with negative values in the lower panel indicating that the number of active  
137 cases is decreasing. Fitted and observed values for the true number can be found in Fig. A1  
138 and Fig. A2 for normal scale and in Fig. A3 and Fig. A4 for log scale.

9 Table 1: Total confirmed infected cases (up to 10<sup>th</sup> March), emergency action start date and characteristics of logistic growth curves of epidemic progress in  
0 mainland China (excluding Hubei) and other 20 provinces with at least 150 cases of SARS-CoV2. Ratio refers to the sick cases at peak to the total number of  
1 infected cases at action date.

| Region                | Total confirmed infected cases | Emergency action start date | Peak date of active sick cases (or peak daily death) | Daily increase peak date | Daily increase end date | Delay from action until sick peak | Delay from action until maximum rate | Time from action to the outbreak end | Time from maximum rate till sick peak | Max Sick cases | Cases at time of maximum daily increase | Total infected cases at maximum daily increase date | Relative rate At peak increase rate (cases/case/d) | Ratio no reporting delay | Ratio 6 days reporting delay |
|-----------------------|--------------------------------|-----------------------------|------------------------------------------------------|--------------------------|-------------------------|-----------------------------------|--------------------------------------|--------------------------------------|---------------------------------------|----------------|-----------------------------------------|-----------------------------------------------------|----------------------------------------------------|--------------------------|------------------------------|
| China excluding Hubei | 13004                          | 24-Jan                      | 11-Feb                                               | 3-Feb                    | 6-Mar                   | 18                                | 10                                   | 42                                   | 8                                     | 9423           | 823                                     | 6692                                                | 0.12                                               | 9.5                      | 2.6                          |
| Hubei                 | 67773                          | 24-Jan                      | 18-Feb                                               | 10-Feb                   | 21-Mar                  | 25                                | 17                                   | 57                                   | 8                                     | 49719          | 4086                                    | 36796                                               | 0.11                                               | 38.5                     | 9.6                          |
| Guangdong             | 1353                           | 23-Jan                      | 10-Feb                                               | 3-Feb                    | 24-Feb                  | 18                                | 11                                   | 32                                   | 7                                     | 1009           | 95                                      | 765                                                 | 0.12                                               | 13.7                     | 3.1                          |
| Henan                 | 1272                           | 25-Jan                      | 10-Feb                                               | 3-Feb                    | 24-Feb                  | 16                                | 9                                    | 30                                   | 7                                     | 947            | 91                                      | 659                                                 | 0.14                                               | 10.0                     | 2.4                          |
| Zhejiang              | 1215                           | 23-Jan                      | 9-Feb                                                | 1-Feb                    | 20-Feb                  | 17                                | 9                                    | 28                                   | 8                                     | 926            | 95                                      | 648                                                 | 0.15                                               | 12.4                     | 2.5                          |
| Hunan                 | 1018                           | 23-Jan                      | 9-Feb                                                | 2-Feb                    | 23-Feb                  | 17                                | 10                                   | 31                                   | 7                                     | 718            | 72                                      | 516                                                 | 0.14                                               | 12.7                     | 2.9                          |
| Anhui                 | 990                            | 24-Jan                      | 11-Feb                                               | 4-Feb                    | 24-Feb                  | 18                                | 11                                   | 31                                   | 7                                     | 781            | 70                                      | 542                                                 | 0.13                                               | 15.4                     | 3.5                          |
| Jiangxi               | 935                            | 24-Jan                      | 11-Feb                                               | 4-Feb                    | 23-Feb                  | 18                                | 11                                   | 30                                   | 7                                     | 731            | 70                                      | 529                                                 | 0.13                                               | 17.3                     | 3.5                          |
| Shandong              | 758                            | 24-Jan                      | 17-Feb                                               | 8-Feb                    | 10-Mar                  | 24                                | 15                                   | 46                                   | 9                                     | 451            | 30                                      | 399                                                 | 0.08                                               | 6.3                      | 2.8                          |
| Jiangsu               | 631                            | 25-Jan                      | 11-Feb                                               | 4-Feb                    | 24-Feb                  | 17                                | 10                                   | 30                                   | 7                                     | 451            | 41                                      | 337                                                 | 0.12                                               | 8.9                      | 2.5                          |
| Chongqing             | 576                            | 24-Jan                      | 11-Feb                                               | 2-Feb                    | 24-Feb                  | 18                                | 9                                    | 31                                   | 9                                     | 416            | 33                                      | 291                                                 | 0.11                                               | 6.2                      | 2.1                          |
| Sichuan               | 539                            | 24-Jan                      | 13-Feb                                               | 4-Feb                    | 26-Feb                  | 20                                | 11                                   | 33                                   | 9                                     | 373            | 28                                      | 291                                                 | 0.10                                               | 6.7                      | 2.4                          |
| Heilongjiang          | 482                            | 25-Jan                      | 14-Feb                                               | 6-Feb                    | 25-Feb                  | 20                                | 12                                   | 31                                   | 8                                     | 374            | 33                                      | 247                                                 | 0.13                                               | 20.4                     | 4.6                          |
| Beijing               | 435                            | 24-Jan                      | 11-Feb                                               | 3-Feb                    | 23-Feb                  | 18                                | 10                                   | 30                                   | 8                                     | 299            | 24                                      | 223                                                 | 0.11                                               | 6.8                      | 2.3                          |
| Shanghai              | 344                            | 24-Jan                      | 9-Feb                                                | 2-Feb                    | 19-Feb                  | 16                                | 9                                    | 26                                   | 7                                     | 261            | 23                                      | 190                                                 | 0.12                                               | 7.7                      | 2.1                          |
| Hebei                 | 318                            | 24-Jan                      | 12-Feb                                               | 5-Feb                    | 25-Feb                  | 19                                | 12                                   | 32                                   | 7                                     | 207            | 18                                      | 161                                                 | 0.11                                               | 10.3                     | 3.1                          |
| Fujian                | 296                            | 24-Jan                      | 10-Feb                                               | 1-Feb                    | 18-Feb                  | 17                                | 8                                    | 25                                   | 9                                     | 238            | 21                                      | 149                                                 | 0.14                                               | 8.2                      | 2.2                          |
| Guangxi               | 252                            | 24-Jan                      | 12-Feb                                               | 3-Feb                    | 21-Feb                  | 19                                | 10                                   | 28                                   | 9                                     | 195            | 14                                      | 137                                                 | 0.10                                               | 7.1                      | 2.4                          |
| Shaanxi               | 245                            | 25-Jan                      | 11-Feb                                               | 2-Feb                    | 19-Feb                  | 17                                | 8                                    | 25                                   | 9                                     | 197            | 16                                      | 126                                                 | 0.12                                               | 6.8                      | 2.1                          |
| Yunnan                | 174                            | 24-Jan                      | 10-Feb                                               | 1-Feb                    | 16-Feb                  | 17                                | 8                                    | 23                                   | 9                                     | 145            | 11                                      | 91                                                  | 0.13                                               | 7.1                      | 2.1                          |
| Hainan                | 168                            | 25-Jan                      | 11-Feb                                               | 4-Feb                    | 20-Feb                  | 17                                | 10                                   | 26                                   | 7                                     | 120            | 10                                      | 94                                                  | 0.10                                               | 6.2                      | 2.1                          |

2  
3



144 Modelled logistic curves show that the total number of infected cases had plateaued by 21  
145 March for Hubei and by 6 March for the rest of mainland China, i.e. 57 and 42 days (range:  
146 23 to 46 days) after the start of suppression measures (Fig. 1, Table 1). No new cases were  
147 reported within mainland China on 18, 19 and 20 March, 2020, with all new cases on those  
148 days from overseas travel, signaling the beginning of the end of the outbreak. However  
149 isolated cases still occur, e.g. there was one new case on 24 March in Hubei.

150

151 The analysis shown in these figures was continually updated from 1 February to 3 March  
152 while the epidemic was progressing<sup>18</sup>. Based on the data up till 16 February 2020, a peak in  
153 sick incidence was identified for 12 February, which was proven correct<sup>19</sup>. Thus, logistic  
154 models may be used to determine early when suppression measures are expected to result in  
155 decreased rate of epidemic growth and a decline in number of sick cases. However, any model  
156 shows lack of fit<sup>16</sup>. The logistic model does not capture that the rate of increase in the early  
157 epidemic is faster than the rate of decline during the tapering out of the epidemic (Appendix  
158 A1). Thus, the logistic underestimates both the early relative growth rate and the increase of  
159 the number of sick people from the start of measures till the peak for the Chinese data  
160 (Appendix A1). Uncertainties in predictions also result from unknown reporting delay<sup>9</sup>.  
161 Improvements may be possible by defining better tailored models, and especially, by  
162 collecting better data, e.g. more (random) testing.

163

164 The results show that suppression can lead to (almost) complete removal of active virus  
165 infected cases from the population, although given that not all active cases have recovered,  
166 the outbreak is not completely over. The virus can still be present in asymptomatic individuals  
167 or it can be re-introduced from unknown reservoirs or foreign countries. Because the vast  
168 majority of the population is not immune to SARS-CoV2, the virus can then rapidly re-

169 establish. Therefore, suppression needs to be followed up by **containment**, a strategy based  
170 on strict surveillance, testing of all individuals with symptoms, and followed by isolation of  
171 all infected individuals and their recent contacts. Currently, in many provinces, except for  
172 Hubei, quarantine restrictions are slowly being lifted, after no new cases have been detected  
173 for several weeks, allowing people to return to work and businesses to start up again.  
174 Moreover, in of China, schools are preparing to reopen in early April and normal social  
175 activities are slowly resuming<sup>20</sup>. These findings indicate that the implemented measures have  
176 been effective for controlling SARS-CoV2 transmission in China<sup>21,22</sup>.

177  
178 Many individuals infected with SARS-CoV2 show minimal or no symptoms. Due in part to  
179 asymptomatic carriers, many infected individuals remain untested and unreported. It is  
180 estimated that unreported cases were responsible for 77% of the reproduction number of the  
181 disease before the start of measures in China and 16-21% thereafter<sup>9,10</sup>. Moreover, about half  
182 of infected individuals that develop symptoms do not show symptoms until 5 days after  
183 infection, and some not up to 14 days, and maybe even up to 30 days<sup>10,23</sup>. Cases with a long  
184 incubation period, if they exist, can contribute to re-emergence of COVID-19 after restrictions  
185 are lifted. However, as the experience in China and several other countries/regions (e.g. South  
186 Korea, Taiwan, Hongkong, Japan and Singapore) has shown, a containment strategy can  
187 prevent the virus from uncontrolled spread if it re-emerges. However, such containment  
188 strategies have been implemented in only few countries thus far. Given the worldwide  
189 pandemic spread of SARS-CoV2, it seems increasingly unavoidable that worldwide  
190 containment will depend on a vaccine. Until a vaccine is ready and accessible, the world  
191 population must confront the pandemic by combining suppression and containment in a  
192 practical way that minimizes the human and economic costs. As noted by Wu and McGoogan

193 (2020), “It is not only individual rights that need to be considered. The rights of those who are  
194 not infected, but at risk of infection, must be considered as well.”

195

196 The most important lessons from the outbreak and its control in China are in our opinion:

197 1. Suppression of SARS-CoV-2 is possible even after widespread community transmission.

198 2. Suppression can be achieved in one to two months if stringent measures are implemented  
199 and maintained.

200 3. If implementation of stringent suppression measures is delayed, as was the case in Hubei,  
201 the peak outbreak time is later, the increase in the number of sick people is greater, the  
202 mortality rate is higher, and the necessary period of suppression is longer.

203 4. China provides compelling evidence that suppression of SARS-CoV-2 transmission can be  
204 achieved within 60 days, even following widespread community transmission. It is the  
205 opinion of the authors that addressing the widespread SARS-CoV-2 transmission in other  
206 countries with unproven mitigation strategies may subject a large part of their populations  
207 unnecessarily to the adverse health risks associated with COVID-19<sup>7,24</sup>.

208

## 209 **Methods**

210 All data were extracted from official reports from the National Health Commission of  
211 China<sup>25</sup>. We obtained time series data of total confirmed, total recovered, and total death cases  
212 for each provinces of China. We used the data starting on 21 January when reporting daily  
213 infected cases started at the national level, and up to 10 March 2020 when almost no new  
214 confirmed case in China<sup>25</sup>. We did not use data after 10 March to minimize the influence of  
215 cases introduced from outside of China.

216

217 We used three-parameter logistic models to fit the time series of the total confirmed and of the  
218 total recovered cases. Parameters refer to the asymptotic value ( $a$ ; number of cases),  
219 the inflection point of the curve ( $b$ ; date) and a scale parameter ( $c$ ; days).

$$220 \quad T_t = \frac{a}{1 + \exp\left(\frac{b-t}{c}\right)}$$

221

$$222 \quad C_t = \frac{a_2}{1 + \exp\left(\frac{b_2-t}{c_2}\right)}$$

223 where  $T_t$  and  $C_t$  are total infected and recovered cases at day  $t$ .

224

225 In addition, we assume a constant daily death rate  $k$ , which was calculated as the average of  
226 number of deceased each day divided by the infected cases at that day:

$$227 \quad k = \frac{1}{n} \sum_{i=1}^n \frac{D_i}{I_i}$$

228 Where  $D_t$  and  $I_t$  are the number of daily death cases and active infected cases at day  $t$ . We  
229 excluded data before 25 January and data where  $I_t < 50$  in this calculation, as values may be  
230 over-estimated at that early stage of the outbreak (under-estimated denominator) and at low  $I_t$   
231 (high variability in the outcome).

232

233 We then calculated the active infected cases, which can be expressed as

$$234 \quad I_t = T_t - TD_t - C_t$$

235 Of which  $TD_t$  is the number of total death at day  $t$ , which equals

$$236 \quad TD_t = \sum_{i=1}^t k I_i$$

237

238 And therefore (see Appendix 1 for inference)

239 
$$I_t = \frac{(T_t - T_{t-1}) - (C_t - C_{t-1}) + I_{t-1}}{1 + k}$$

240

241 where  $T_t - T_{t-1}$  is the daily change in the number of infected cases, and  $C_t - C_{t-1}$  is the daily  
242 change in the number of recovered cases.

243

244 Based on the fitted model, we then calculated the peak date of 1) active sick people, which is  
245 also the date of peak number of daily death, 2) number of sick cases during the peak, 3) the  
246 date of maximum increase in the number of infected cases and 4) the daily rate of increase on  
247 this date, 5) total infected cases on this date, 6) the relative rate on this date, 7) the end date of  
248 daily increase ( $<1$ ) case (operationally the end of the epidemic), and 8) time from maximum  
249 increase till sick peak. Taking the date of public health emergency action as the  
250 implementation of suppression measures<sup>26</sup>, which varied between 23 January to 25 January  
251 across provinces (we set the median date, 24 January as the date for entire China), we then  
252 calculated 9) the delay from the action date until the sick peak, 10) the delay from the action  
253 date until the date at which the rate of increase peaked, 11) the time from suppression measure  
254 till the end date of daily increase in number of reported infections, 12) the ratio between sick  
255 cases at peak and total infected case at the action date, as well as 13) the same ratio  
256 considering a reporting delay of 6 days<sup>9</sup>, i.e. by taking the ratio of  $sick(t_{peak})/sick(t_{action}+6)$ .

257

258 Calculations were made for 20 Chinese provinces with more than 150 infected cases, and also  
259 for China excluding Hubei, by far the worst affected province. . The built-in function  
260 “SSlogis” in R<sup>27</sup> was used to fit logistic growth curves. Data were obtained using package  
261 “nCov2019”<sup>28,29</sup>.

262

263 **Acknowledgements**

264 We thank Jiajun Liu, Elmer Villanueva, Kevin Schneider, David Kottelenberg, Wytse van der  
265 Werf, Bouke van der Werf, Marco Pautasso, and Hans Heesterbeek for comments and  
266 suggestions.

267

## 268 References

- 269 1 WHO. *Coronavirus disease 2019 (COVID-19) situation report-64, 24 March 2020*,  
270 <[https://www.who.int/docs/default-source/coronaviruse/situation-reports/20200324-](https://www.who.int/docs/default-source/coronaviruse/situation-reports/20200324-sitrep-64-covid-19.pdf?sfvrsn=703b2c40_2)  
271 <[sitrep-64-covid-19.pdf?sfvrsn=703b2c40\\_2](https://www.who.int/docs/default-source/coronaviruse/situation-reports/20200324-sitrep-64-covid-19.pdf?sfvrsn=703b2c40_2)> (2020).
- 272 2 WHO. *Coronavirus disease 2019 (COVID-19) situation report-58, 18 March 2020*,  
273 <[https://www.who.int/docs/default-source/coronaviruse/situation-reports/20200318-](https://www.who.int/docs/default-source/coronaviruse/situation-reports/20200318-sitrep-58-covid-19.pdf?sfvrsn=20876712_2)  
274 <[sitrep-58-covid-19.pdf?sfvrsn=20876712\\_2](https://www.who.int/docs/default-source/coronaviruse/situation-reports/20200318-sitrep-58-covid-19.pdf?sfvrsn=20876712_2)> (2020).
- 275 3 Ferguson, N. M. *et al.* Impact of non-pharmaceutical interventions (NPIs) to reduce  
276 COVID- 19 mortality and healthcare demand. *Imperial College COVID-19 Response*  
277 *Team* (2020).
- 278 4 Hellewell, J. *et al.* Feasibility of controlling COVID-19 outbreaks by isolation of cases  
279 and contacts. *The Lancet Global Health* **8**, e488-e496,  
280 doi:[https://doi.org/10.1016/S2214-109X\(20\)30074-7](https://doi.org/10.1016/S2214-109X(20)30074-7) (2020).
- 281 5 Lai, S. *et al.* Effect of non-pharmaceutical interventions for containing the COVID-19  
282 outbreak in China. *medRxiv*, 2020.2003.2003.20029843,  
283 doi:10.1101/2020.03.03.20029843 (2020).
- 284 6 Pueyo, T. *Coronavirus: why you must act now*,  
285 <[https://medium.com/@tomaspueyo/coronavirus-act-today-or-people-will-die-](https://medium.com/@tomaspueyo/coronavirus-act-today-or-people-will-die-f4d3d9cd99ca)  
286 <[f4d3d9cd99ca](https://medium.com/@tomaspueyo/coronavirus-act-today-or-people-will-die-f4d3d9cd99ca)> (2020).
- 287 7 Anderson, R. M., Heesterbeek, H., Klinkenberg, D. & Hollingsworth, T. D. How will  
288 country-based mitigation measures influence the course of the COVID-19 epidemic?  
289 *The Lancet*, doi:10.1016/S0140-6736(20)30567-5 (2020).
- 290 8 Wu, Z. & McGoogan, J. M. Characteristics of and Important Lessons From the  
291 Coronavirus Disease 2019 (COVID-19) Outbreak in China: Summary of a Report of  
292 72 314 Cases From the Chinese Center for Disease Control and Prevention. *JAMA*,  
293 doi:10.1001/jama.2020.2648 (2020).
- 294 9 Li, R. *et al.* Substantial undocumented infection facilitates the rapid dissemination of  
295 novel coronavirus (SARS-CoV2). *Science*, eabb3221, doi:10.1126/science.abb3221  
296 (2020).
- 297 10 Wang, C. *et al.* Evolving Epidemiology and Impact of Non-pharmaceutical  
298 Interventions on the Outbreak of Coronavirus Disease 2019 in Wuhan, China.  
299 *medRxiv*, 2020.2003.2003.20030593, doi:10.1101/2020.03.03.20030593 (2020).
- 300 11 Kot, M. *Elements of mathematical ecology*. (Cambridge University Press, 2001).
- 301 12 Edelstein-Keshet, L. *Mathematical Models in Biology*. *Society for Industrial and*  
302 *Applied Mathematics*. 579 (British Columbia, 2005).
- 303 13 Murray, J. D. *Mathematical biology: I. An introduction*. 3rd edition. Vol. 17 (Springer  
304 Science & Business Media, 2007).
- 305 14 Wu, J. T., Leung, K. & Leung, G. M. Nowcasting and forecasting the potential  
306 domestic and international spread of the 2019-nCoV outbreak originating in Wuhan,  
307 China: a modelling study. *The Lancet* **395**, 689-697, doi:10.1016/S0140-  
308 6736(20)30260-9 (2020).
- 309 15 Batista, M. Estimation of the final size of the second phase of the coronavirus  
310 epidemic by the logistic model. *medRxiv*, 2020.2003.2011.20024901,  
311 doi:10.1101/2020.03.11.20024901 (2020).
- 312 16 Wu, K., Darcet, D., Wang, Q. & Sornette, D. Generalized logistic growth modeling of  
313 the COVID-19 outbreak in 29 provinces in China and in the rest of the world. *arXiv*  
314 (2020).

- 315 17 Sun, Q., Qiu, H., Huang, M. & Yang, Y. Lower mortality of COVID-19 by early  
316 recognition and intervention: experience from Jiangsu Province. *Annals of Intensive*  
317 *Care* **10**, 33, doi:10.1186/s13613-020-00650-2 (2020).
- 318 18 Zhao, P., Zou, Y., Han, L. & Wang, X. *Website for information of 2019-nCoV*  
319 *outbreak*, <<https://ncov2020.org/en/>> (2020).
- 320 19 XJTU. *Model indicates current COVID-19 infections in China already declining*,  
321 <[https://www.xjtu.edu.cn/en/news/2020/02/model-indicates-current-covid-19-](https://www.xjtu.edu.cn/en/news/2020/02/model-indicates-current-covid-19-infections-in-china-already-declining)  
322 [infections-in-china-already-declining](https://www.xjtu.edu.cn/en/news/2020/02/model-indicates-current-covid-19-infections-in-china-already-declining)> (2020).
- 323 20 Jiangsu Education Department.  
324 <[http://jyt.jiangsu.gov.cn/art/2020/3/23/art\\_58320\\_9019848.html](http://jyt.jiangsu.gov.cn/art/2020/3/23/art_58320_9019848.html)> (2020).
- 325 21 Kupferschmidt, K. & Cohen, J. Can China's COVID-19 strategy work elsewhere?  
326 *Science* **367**, 1061-1062, doi:10.1126/science.367.6482.1061 (2020).
- 327 22 Ainslie, K. E. C. *et al.* Evidence of initial success for China exiting COVID-19 social  
328 distancing policy after achieving containment. *Imperial College COVID-19 Response*  
329 *Team* (2020).
- 330 23 Lauer, S. A. *et al.* The Incubation Period of Coronavirus Disease 2019 (COVID-19)  
331 From Publicly Reported Confirmed Cases: Estimation and Application. *Annals of*  
332 *Internal Medicine*, doi:10.7326/m20-0504 (2020).
- 333 24 Jia, W. *et al.* Extended SIR prediction of the epidemics trend of COVID-19 in Italy  
334 and compared with Hunan, China. *medRxiv*, 2020.2003.2018.20038570,  
335 doi:10.1101/2020.03.18.20038570 (2020).
- 336 25 National Health Commission of the People's Republic of China.  
337 <<http://www.nhc.gov.cn>> (2020).
- 338 26 The State Council of the PRC. *Contingency Plan of National Public Health*  
339 *Emergency*, <[http://www.gov.cn/yjgl/2006-02/26/content\\_211654.htm](http://www.gov.cn/yjgl/2006-02/26/content_211654.htm)> (2006).
- 340 27 R Core Team. *R: A language and environment for statistical computing. Version*  
341 *3.6.3*. Vol. 2020 (R Foundation for Statistical Computing, 2020).
- 342 28 Yu, G. nCov2019: Stats of the '2019-nCov' Cases. R package version 0.3.3. (2020).
- 343 29 Wu, T., Ge, X., Yu, G. & Hu, E. Open-source analytics tools for studying the COVID-  
344 19 coronavirus outbreak. *medRxiv*, 2020.2002.2025.20027433,  
345 doi:10.1101/2020.02.25.20027433 (2020).
- 346

347

348



## Supplementary information

Table A1. Estimated model parameters per province and for China (excluding Hubei) and other 20 provinces with at least 150 cases of SARS-CoV2

| Region                  | Daily fatality rate (%) | a           | b          | c           | R-squared | a2          | b2         | c2          | R-squared2 |
|-------------------------|-------------------------|-------------|------------|-------------|-----------|-------------|------------|-------------|------------|
| China (excluding Hubei) | 0.05 ± 0.01             | 12882 ± 42  | 14.7 ± 0.1 | 3.91 ± 0.07 | 0.999     | 12558 ± 83  | 31.9 ± 0.1 | 5.43 ± 0.09 | 0.999      |
| Hubei                   | 0.34 ± 0.05             | 67622 ± 463 | 21.3 ± 0.2 | 4.13 ± 0.13 | 0.996     | 55387 ± 556 | 39.6 ± 0.2 | 5.73 ± 0.08 | 0.999      |
| Guangdong               | 0.05 ± 0.03             | 1344 ± 3    | 14 ± 0.1   | 3.52 ± 0.05 | 0.999     | 1304 ± 24   | 32.4 ± 0.4 | 6.19 ± 0.24 | 0.995      |
| Henan                   | 0.17 ± 0.06             | 1270 ± 4    | 13.7 ± 0.1 | 3.47 ± 0.06 | 0.999     | 1288 ± 8    | 29.8 ± 0.1 | 4.62 ± 0.09 | 0.999      |
| Zhejiang                | 0.00 ± 0.00             | 1196 ± 5    | 12.5 ± 0.1 | 3.13 ± 0.09 | 0.997     | 1245 ± 16   | 31.6 ± 0.3 | 6.30 ± 0.18 | 0.997      |
| Hunan                   | 0.02 ± 0.01             | 1018 ± 3    | 12.9 ± 0.1 | 3.50 ± 0.07 | 0.999     | 972 ± 11    | 27.8 ± 0.2 | 5.30 ± 0.17 | 0.997      |
| Anhui                   | 0.02 ± 0.01             | 993 ± 2     | 15.3 ± 0.1 | 3.54 ± 0.04 | 0.999     | 1003 ± 5    | 32.4 ± 0.1 | 4.43 ± 0.06 | 0.999      |
| Jiangxi                 | 0.00 ± 0.00             | 936 ± 3     | 15.1 ± 0.1 | 3.32 ± 0.06 | 0.999     | 938 ± 5     | 31.6 ± 0.1 | 4.61 ± 0.07 | 0.999      |
| Shandong                | 0.04 ± 0.02             | 774 ± 13    | 19.6 ± 0.5 | 6.39 ± 0.40 | 0.979     | 854 ± 39    | 39.6 ± 0.9 | 7.81 ± 0.37 | 0.993      |
| Jiangsu                 | 0.00 ± 0.00             | 635 ± 2     | 13.5 ± 0.1 | 3.89 ± 0.09 | 0.998     | 616 ± 5     | 28.9 ± 0.1 | 4.89 ± 0.12 | 0.998      |
| Chongqing               | 0.05 ± 0.02             | 575 ± 2     | 12.9 ± 0.1 | 4.40 ± 0.09 | 0.998     | 543 ± 9     | 30.8 ± 0.3 | 5.57 ± 0.22 | 0.995      |
| Sichuan                 | 0.03 ± 0.02             | 536 ± 3     | 15.2 ± 0.2 | 4.72 ± 0.14 | 0.996     | 515 ± 9     | 34.7 ± 0.3 | 6.89 ± 0.19 | 0.997      |
| Beijing                 | 0.11 ± 0.05             | 411 ± 2     | 14.2 ± 0.1 | 4.35 ± 0.12 | 0.996     | 330 ± 3     | 31.9 ± 0.2 | 5.92 ± 0.11 | 0.999      |
| Heilongjiang            | 0.15 ± 0.05             | 482 ± 2     | 16.8 ± 0.1 | 3.66 ± 0.06 | 0.999     | 445 ± 6     | 34.7 ± 0.2 | 5.03 ± 0.15 | 0.997      |
| Shanghai                | 0.04 ± 0.03             | 337 ± 1     | 13 ± 0.1   | 3.67 ± 0.06 | 0.999     | 311 ± 2     | 29.4 ± 0.1 | 4.35 ± 0.11 | 0.998      |
| Hebei                   | 0.11 ± 0.05             | 319 ± 2     | 14.9 ± 0.1 | 4.42 ± 0.12 | 0.997     | 315 ± 2     | 29 ± 0.1   | 4.56 ± 0.07 | 0.999      |
| Fujian                  | 0.02 ± 0.02             | 294 ± 2     | 10.9 ± 0.1 | 3.57 ± 0.12 | 0.995     | 307 ± 3     | 31.4 ± 0.2 | 5.45 ± 0.13 | 0.998      |
| Guangxi                 | 0.03 ± 0.02             | 251 ± 1     | 14.2 ± 0.1 | 4.38 ± 0.10 | 0.998     | 255 ± 3     | 35.7 ± 0.2 | 5.96 ± 0.14 | 0.998      |
| Shaanxi                 | 0.03 ± 0.03             | 244 ± 1     | 11.8 ± 0.1 | 3.89 ± 0.09 | 0.997     | 233 ± 2     | 30.1 ± 0.1 | 4.32 ± 0.11 | 0.998      |
| Yunnan                  | 0.07 ± 0.05             | 172 ± 1     | 12.6 ± 0.2 | 3.77 ± 0.19 | 0.988     | 177 ± 2     | 32.5 ± 0.2 | 4.20 ± 0.13 | 0.997      |
| Hainan                  | 0.18 ± 0.09             | 170 ± 1     | 15 ± 0.1   | 4.41 ± 0.12 | 0.996     | 163 ± 1     | 31.4 ± 0.1 | 4.64 ± 0.11 | 0.998      |

Fig. A1

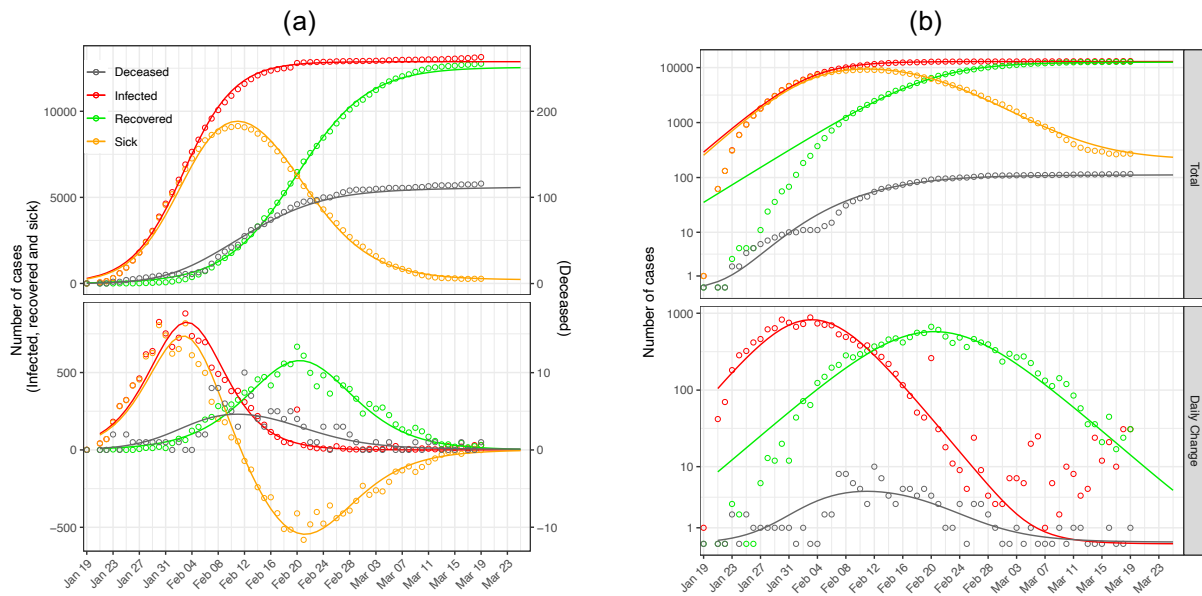

Fig. A1 Observed and fitted epidemics of SARS-CoV2 in mainland China excluding Hubei province for normal- (a) and log-scale (b) y-axis. Dots are observed cases and lines are model fits. Top panel refers total cases and bottom panel refers to daily changes. For the normal scale (A), the left y-axis is for infected, recovered and sick cases and the right y-axis for deceased cases. Red colour indicates the total number of infected cases (confirmed and suspected) (top panel) or the daily rate of increase in the number of cases (bottom panel). Green colour indicate the recovered cases in both panels. Grey colour indicates cumulative deaths in the upper graph and daily death cases in the lower panel. Orange colour indicates the number of “active” cases (top panel), i.e. infected and not yet recovered or deceased, and the daily change in the number of active cases (bottom panel). Negative values (in normal scale) in the lower panel mean that the number of active cases is decreasing.

Fig. A2-A

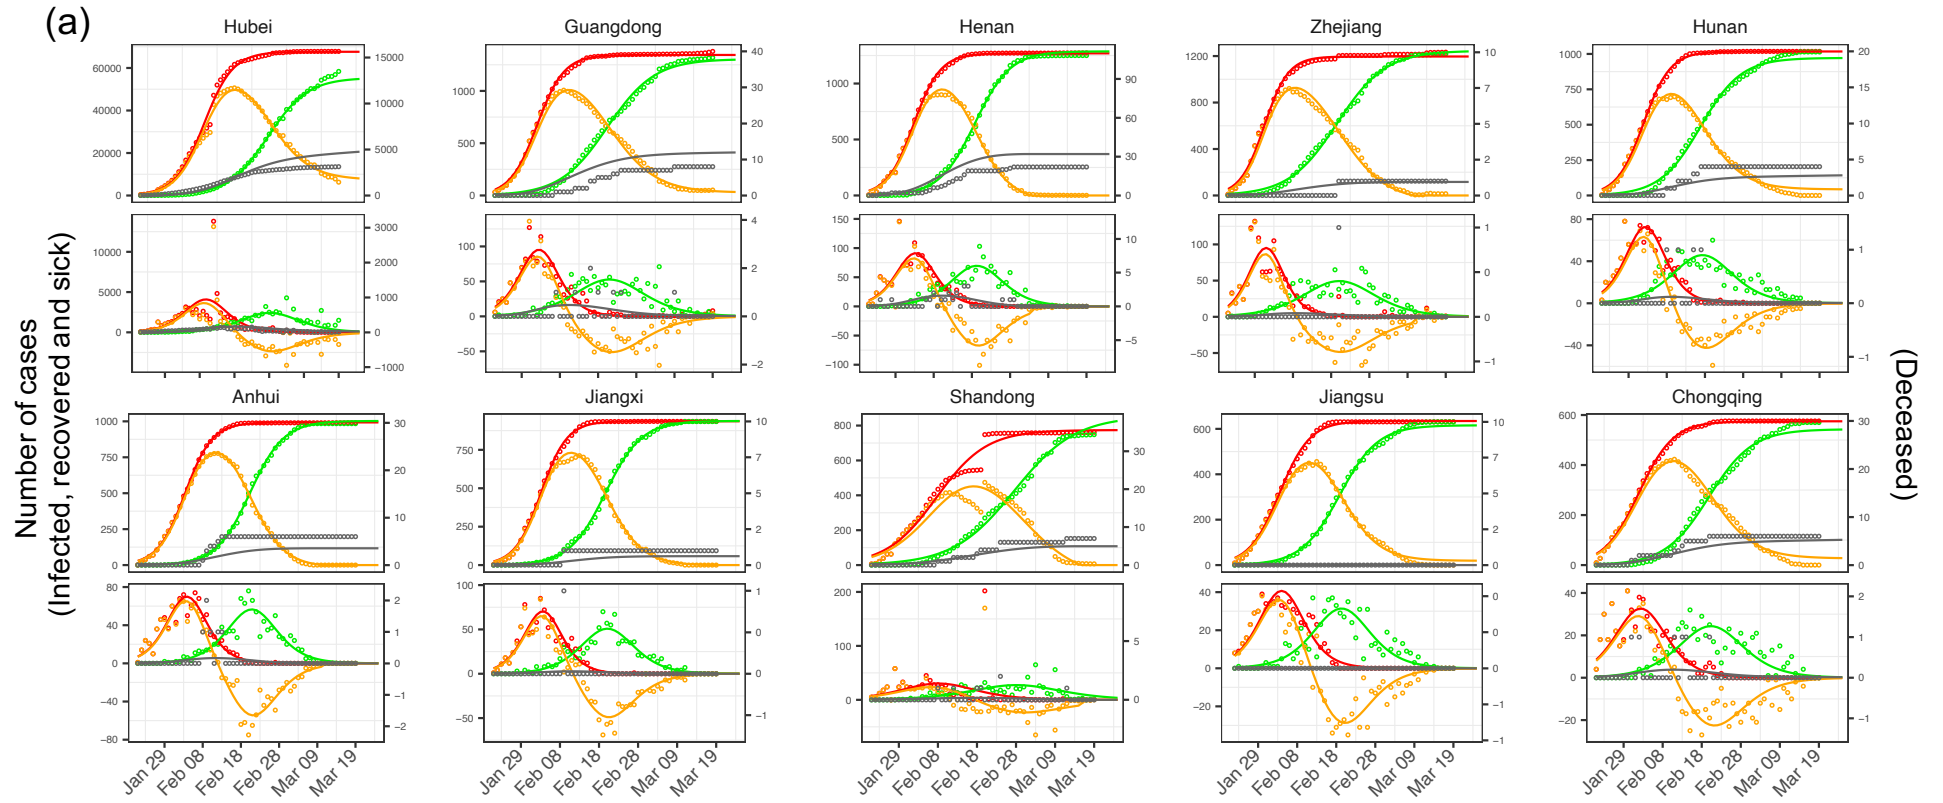

Fig. A2-a (continue)

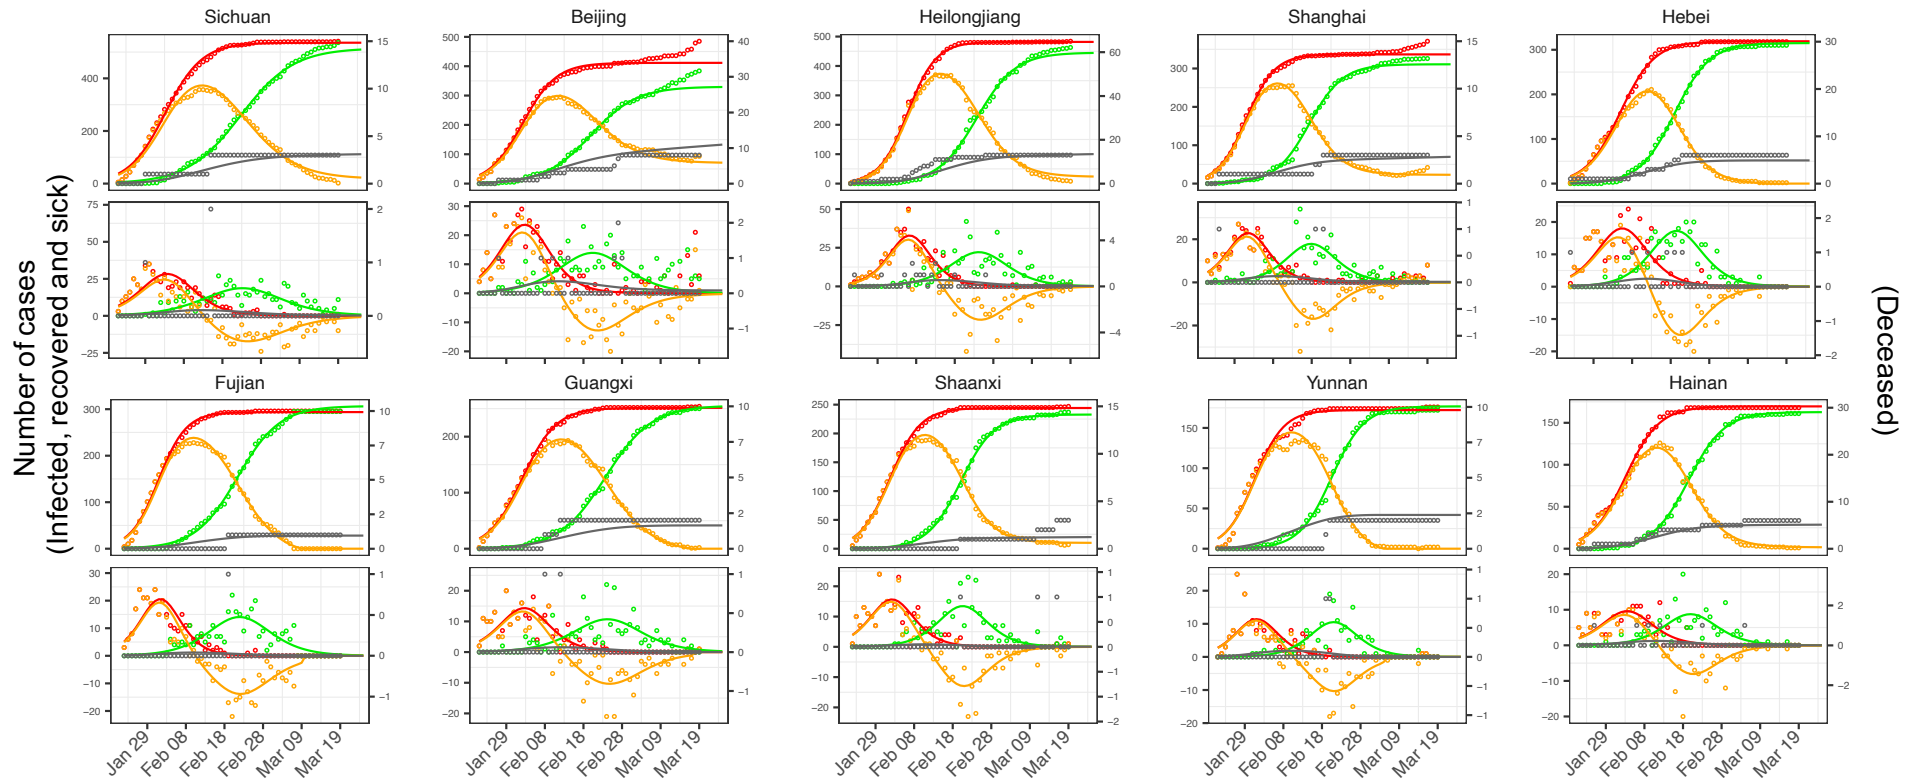

Fig. A2-b

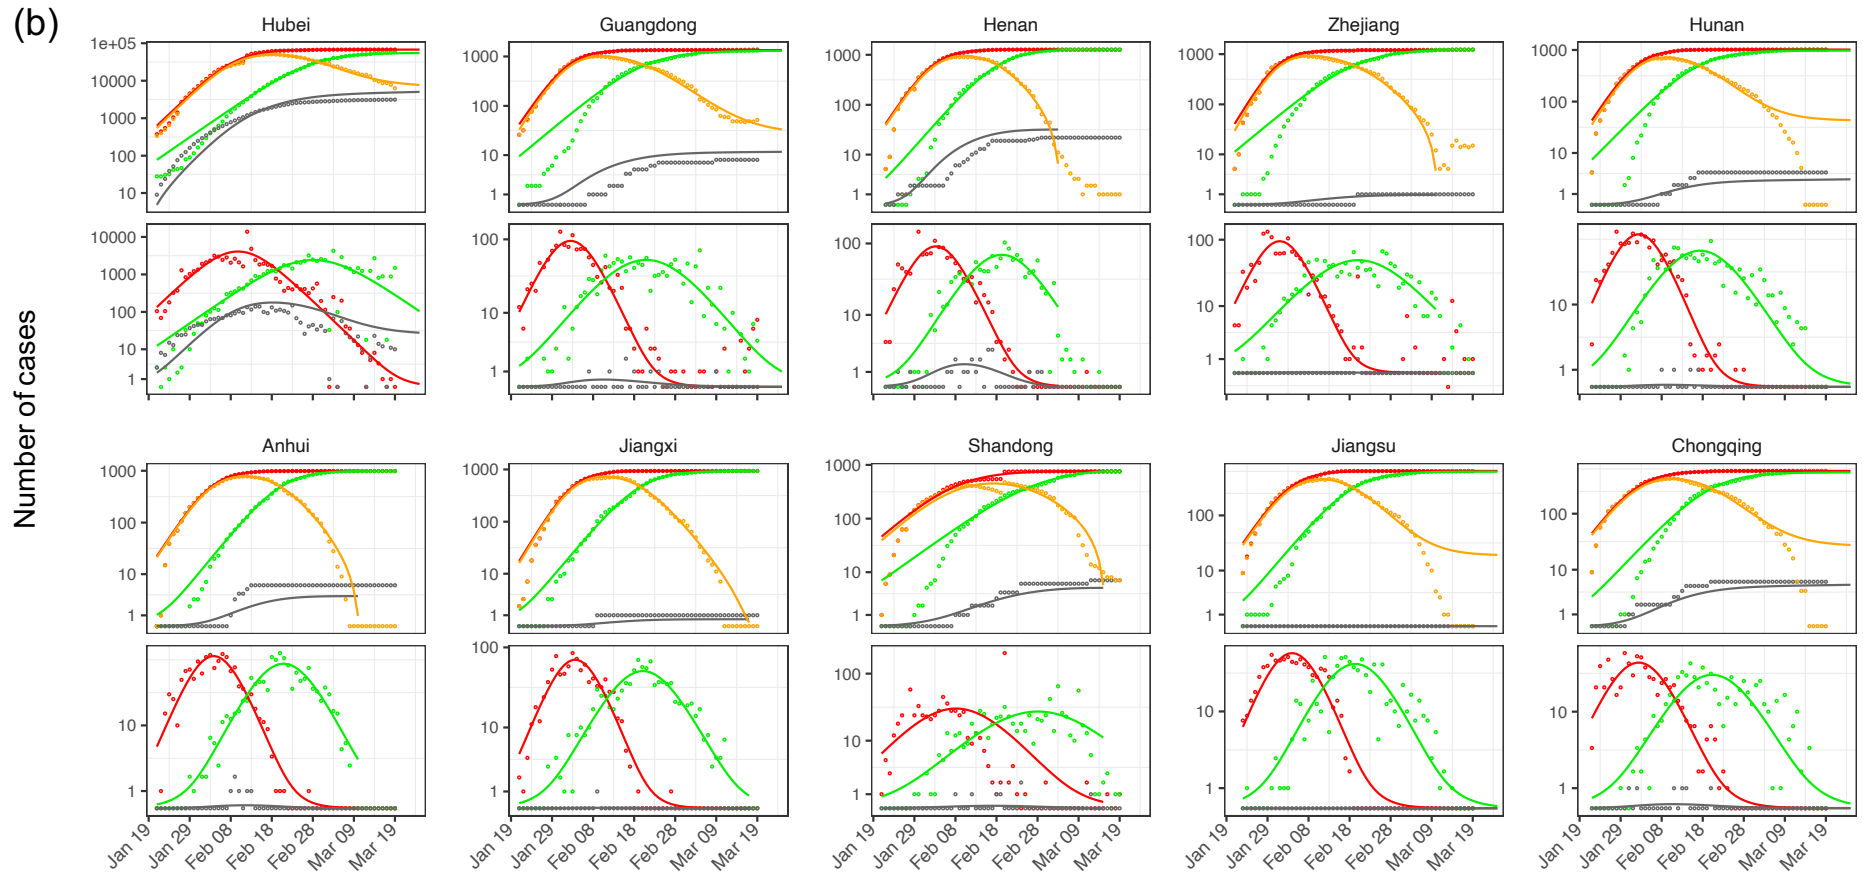

Fig. A2-b (continue)

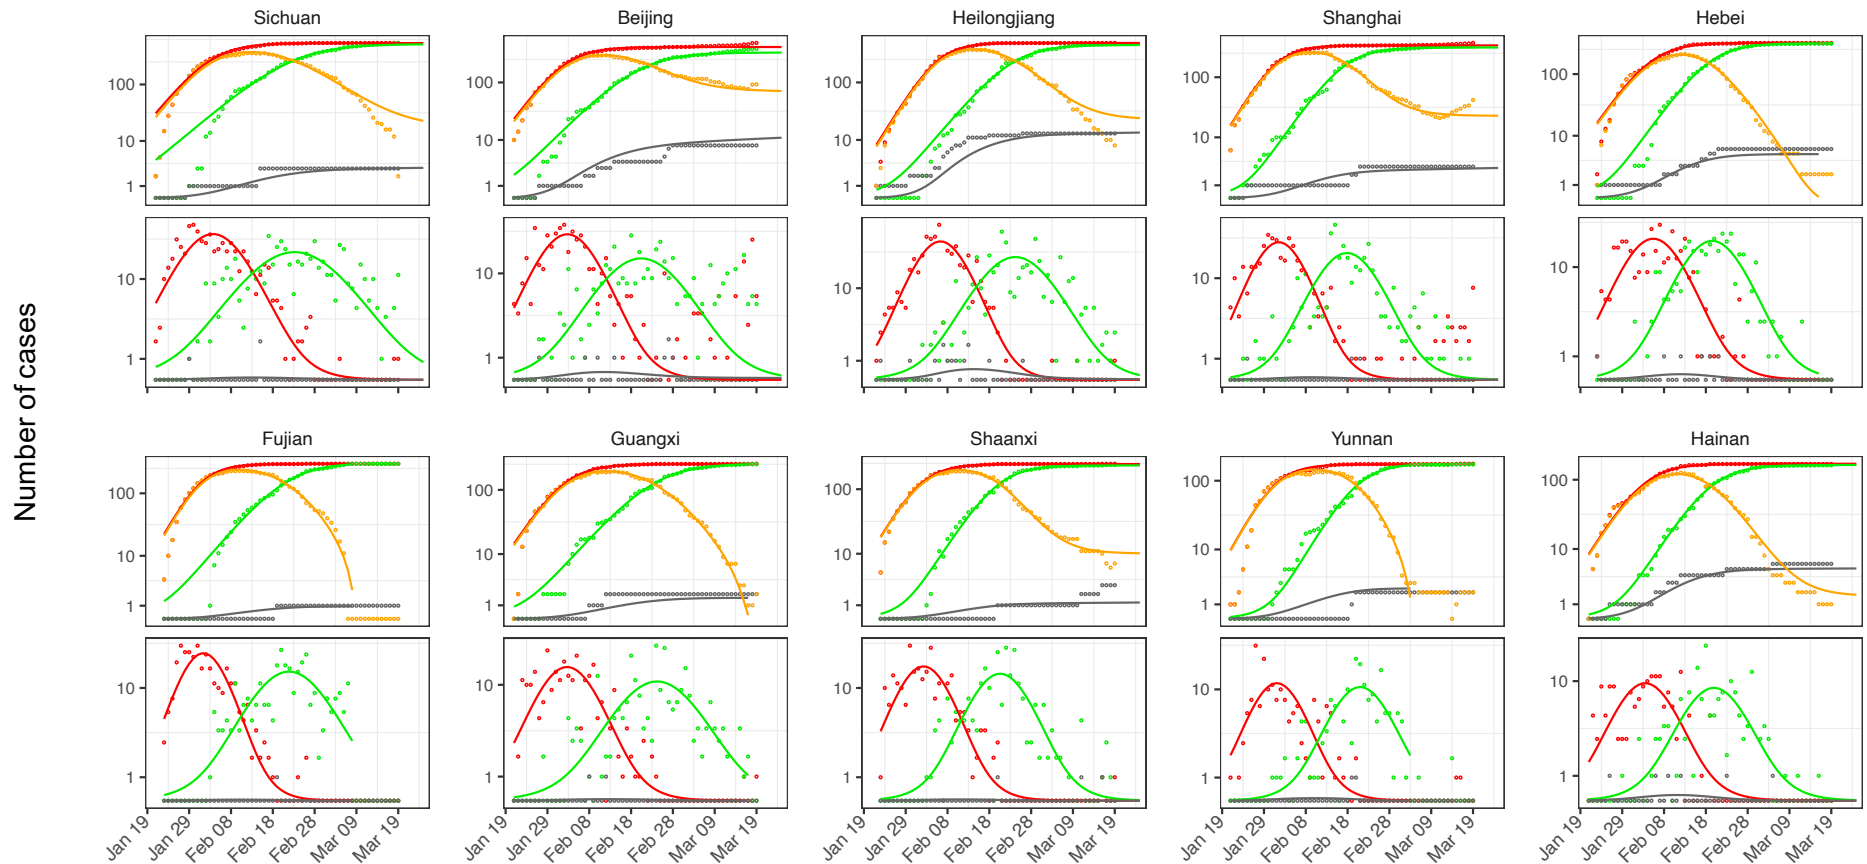

Fig. A2. Epidemics of SARS-CoV2 in 20 Chinese provinces with a minimum of 150 cases for normal- (a) and log-scale (b) y-axis. Dots are observed cases and lines are model fits. Red, green and grey colors indicate confirmed, recovered and deceased cases. For the normal scale (a), the left y-axis is for infected, recovered and sick cases and the right y-axis for deceased cases. Orange color indicates the number of “active” sick cases (relative to total infected, top panel), i.e. infected and not yet recovered or deceased, and the daily changes (bottom panel), with negative values (in normal scale) in the lower panel indicating that the number of active cases is decreasing. The upper panel for each province refers to the total number of cases while the lower panel refers to the daily change in the number of cases.

## Appendix 1. Formula inference

$$I_t = T_t - \sum_{i=1}^t k I_i - C_t \quad (1)$$

$$I_{t-1} = T_{t-1} - \sum_{i=1}^{t-1} k I_i - C_{t-1} \quad (2)$$

Equation (1) - Equation (2)

$$I_t - I_{t-1} = (T_t - T_{t-1}) - (C_t - C_{t-1}) - k I_t$$

$$I_t - I_{t-1} + k I_t = (T_t - T_{t-1}) - (C_t - C_{t-1})$$

$$I_t + k I_t = (T_t - T_{t-1}) - (C_t - C_{t-1}) + I_{t-1}$$

$$I_t (1 + k) = (T_t - T_{t-1}) - (C_t - C_{t-1}) + I_{t-1}$$

Therefore,

$$I_t = \frac{(T_t - T_{t-1}) - (C_{t-1} - C_{t-1}) + I_{t-1}}{1 + k}$$
